# Supplementary material for: Risk Factors for Buruli Ulcer in Ghana—A Case Control Study in the Suhum-Kraboa-Coaltar and Akuapem South Districts of the Eastern Region
Source: PubMed Central journal article supplement (PMC4238991; doi:10.1371/journal.pntd.0003279), 2014-11-20
Supplement: pntd.0003279.s004.pdf [file pntd.0003279.s004.pdf]

**Questionnaire S1 :QUESTIONNIARS FOR RISK FACTORS FOR TRANSMISSION OF MYCOBACTERIUM  
ULCERANS IN SUHUM- KRABOA-COALTAR AND AKUAPEM SOUTH DISTRICTS OF EASTERN REGION,  
GHANA.**

Form number

|  |  |  |
|--|--|--|
|  |  |  |
|--|--|--|

please circle the Appropriate Response

MFORMNUM

| Q.N <sup>0</sup> | Questions and filters                                                             | Answers                                                                                                                                                                                                                                                                                                                                                                                                                                                                                                                                            | Codes                      | Skips          | FIELDS |  |  |  |  |  |  |  |    |  |      |
|------------------|-----------------------------------------------------------------------------------|----------------------------------------------------------------------------------------------------------------------------------------------------------------------------------------------------------------------------------------------------------------------------------------------------------------------------------------------------------------------------------------------------------------------------------------------------------------------------------------------------------------------------------------------------|----------------------------|----------------|--------|--|--|--|--|--|--|--|----|--|------|
| 1.               | ID                                                                                | <table border="1" style="display: inline-table; vertical-align: middle;"><tr><td style="width: 20px; height: 20px;"></td><td style="width: 20px; height: 20px;"></td></tr></table>                                                                                         |                            |                |        |  |  |  |  |  |  |  | ID |  |      |
|                  |                                                                                   |                                                                                                                                                                                                                                                                                                                                                                                                                                                                                                                                                    |                            |                |        |  |  |  |  |  |  |  |    |  |      |
| 2.               | Date of interview                                                                 | <table border="1" style="display: inline-table; vertical-align: middle;"><tr><td style="width: 20px; height: 20px;"></td><td style="width: 20px; height: 20px;"></td></tr></table> |                            |                |        |  |  |  |  |  |  |  |    |  | DINT |
|                  |                                                                                   |                                                                                                                                                                                                                                                                                                                                                                                                                                                                                                                                                    |                            |                |        |  |  |  |  |  |  |  |    |  |      |
| 3.               | Do you have BU?<br>( <i>Wo wɔ Buruli Ulcer?</i> )                                 | Yes (Aane)<br>No(Daabi)                                                                                                                                                                                                                                                                                                                                                                                                                                                                                                                            | 1<br>2                     | >>7            | BUD    |  |  |  |  |  |  |  |    |  |      |
| 4.               | Has the BU been confirmed?<br>( <i>Wɔn asi no pi se wo wɔ Buruli ulcer</i> )      | Yes (Aane)<br>No (Daabi)                                                                                                                                                                                                                                                                                                                                                                                                                                                                                                                           | 1<br>2                     |                | CON    |  |  |  |  |  |  |  |    |  |      |
| 5a.              | What form was the first lesion?<br>( <i>Yareε yi rehyε aseε no, na ete sɛn?</i> ) | Papule<br>Nodule<br>Plaque<br>Edema<br>Active Ulcers                                                                                                                                                                                                                                                                                                                                                                                                                                                                                               | 1<br>2<br>3<br>4<br>5      |                | LES    |  |  |  |  |  |  |  |    |  |      |
| 5b.              | What form is the lesion now?<br>( <i>Sesei yareε no te sɛn?</i> )                 | Papule<br>Nodule<br>Plaque<br>Edema<br>Active Ulcers<br>Old case (healed lesion)                                                                                                                                                                                                                                                                                                                                                                                                                                                                   | 1<br>2<br>3<br>4<br>5<br>6 | } >> 6<br>>>5c |        |  |  |  |  |  |  |  |    |  |      |

|     |                                                                                                |                                                                                           |                                      |  |      |
|-----|------------------------------------------------------------------------------------------------|-------------------------------------------------------------------------------------------|--------------------------------------|--|------|
|     |                                                                                                |                                                                                           |                                      |  |      |
| 5c. | How old is the healed lesion( Old case)                                                        | _____                                                                                     |                                      |  |      |
| 6.  | Which part of the body is the lesion located?<br>( <i>Wo honam henfa na saa akuro yi da?</i> ) | Leg<br>Arm<br>Trunk<br>Head<br>Distal<br>Proximal/Trunk/Head )<br>Right side<br>Left side | 1<br>2<br>3<br>4<br>5<br>6<br>7<br>8 |  | LOC  |
| 7.  | How old are you? ( Age in years)<br>( <i>Wɔn di mfeɛ sɛn?</i> )                                | <input type="text"/> <input type="text"/>                                                 |                                      |  | AGEC |
| 8.  | Gender ( <i>W'abɔsuo ne sɛn?</i> )                                                             | Male<br>Female                                                                            | 1<br>2                               |  | SEX  |
| 9.  | What is the ethnic group of your father?<br>( <i>Wo papa yɛ deɛn nii?</i> )                    | Ga/Adangme<br>Ewe<br>Akan<br>Others                                                       | 1<br>2<br>3<br>4                     |  | ETHF |
| 10. | What is the ethnic group of your mother?<br>( <i>Wo maam yɛ deɛn ni?</i> )                     | Ga/Adangme<br>Ewe<br>Akan<br>Others                                                       | 1<br>2<br>3<br>4                     |  | ETHM |
| 11. | What is your educational level?<br>( <i>W'akɔ sukuu aduru sɛn?</i> )                           | No Education<br>Primary/JHS<br>Secondary                                                  | 1<br>2<br>3                          |  | EDUC |

|                                |                                                                                                                                          |                          |        |  |      |
|--------------------------------|------------------------------------------------------------------------------------------------------------------------------------------|--------------------------|--------|--|------|
|                                |                                                                                                                                          | Tertiary                 | 4      |  |      |
| 12.                            | What is your marital status?<br>( <i>W'awareε gyina pen ye den?</i> )                                                                    | Married<br>Not married   | 1<br>2 |  | MAR  |
| 13.                            | How much money do you spend in this household per month? ( <i>Bosome biara, sika sen na mo de hwε fie?</i> )                             | Gh¢.....per month        |        |  | HHS  |
| <b>HEALTH</b>                  |                                                                                                                                          |                          |        |  |      |
| 14.                            | Do you have a BCG scar? Look on the left shoulder.<br>( <i>Wo wɔ BCG nsaman wa kɔtwa no bi wɔ wo ho? Hwε w'abɛti a εwɔ wo nifa so.</i> ) | Yes (Aane)<br>No (Daabi) | 1<br>2 |  | BCG  |
| 15.                            | Have you had tuberculosis before? ( <i>W'anya nsamanwa da?</i> )                                                                         | Yes (Aane)<br>No(Daabi)  | 1<br>2 |  | HTB  |
| 16.                            | Do you have a family history of tuberculosis?<br>( <i>W'abusua mu no, yareε nsamanwa yi ye adeε a obi anya yareε yi bi da?</i> )         | Yes (Aane)<br>No (Daabi) | 1<br>2 |  | FHTB |
| 17.                            | Have you ever had blood in urine before?<br>( <i>W'adwonsɔ a mogya wɔ mu da? )</i>                                                       | Yes (Aane)<br>No(Daabi)  | 1<br>2 |  | BLD  |
| <b>HOUSEHOLD / ENVIRONMENT</b> |                                                                                                                                          |                          |        |  |      |
| 18.                            | Is the wall of your house made of Mud?<br>( <i>Wo fie afasuo no nɛtεε na wɔde ayε anaa?</i> )                                            | Yes (Aane)<br>No(Daabi)  | 1<br>2 |  | WAL  |
| 19.                            | Is the floor of your house made of Mud?<br>( <i>Fie no fɔm no, wɔde nɛtεε na ayε anaa?</i> )                                             | Yes (Aane)<br>No(Daabi)  | 1<br>2 |  | FLO  |

|     |                                                                                                                                                                                                                                                                    |                         |        |  |     |
|-----|--------------------------------------------------------------------------------------------------------------------------------------------------------------------------------------------------------------------------------------------------------------------|-------------------------|--------|--|-----|
| 20. | How many people are in your household?<br>( <i>Nipa sen na ete wo fie?</i> )                                                                                                                                                                                       | _____                   |        |  | HHN |
| 21. | Do you have Cocoa plantation in your immediate neighborhood?<br>( <i>Kookoofuo ben wo mpɔtam ha anaa?</i> )                                                                                                                                                        | Yes (Aane)<br>No(Daabi) | 1<br>2 |  | COA |
| 22. | Do you have Coffee plantation in your immediate neighborhood?<br>( <i>Coffeefuo bi ben wo mpɔtam ha anaa?</i> )                                                                                                                                                    | Yes (Aane)<br>No(Daabi) | 1<br>2 |  | COF |
| 23. | Do you have bush in your immediate neighborhood?<br>( <i>Burɔnoo a wo te no, nwura afu wɔ anaa?</i> )                                                                                                                                                              | Yes (Aane)<br>No(Daabi) | 1<br>2 |  | BUS |
| 24. | Do you have woods in your immediate neighborhood?<br>( <i>Wɔ burɔnoo no so ye nnuam anaa?</i> )                                                                                                                                                                    | Yes (Aane)<br>No(Daabi) | 1<br>2 |  | WOD |
| 25. | Do you have a wetland (Swamp) that is an area of land, usually fairly large, that is always wet and is overgrown with various shrubs and trees in your immediate neighborhood?<br>( <i>Wo burunoo yi so ha, aforɔ wɔ ha a kɛsɛ a nwura ahodoɔ fu wɔ mu anaa?</i> ) | Yes (Aane)<br>No(Daabi) | 1<br>2 |  | SWP |
| 26. | Do you have river in your immediate neighborhood?<br>( <i>Mo wɔ nsubɔntene wɔ mo mpɔtam ha?</i> )                                                                                                                                                                  | Yes (Aane)<br>No(Daabi) | 1<br>2 |  | RIV |
| 27. | Do you Share living space (that is staying under the same roof) with goats?<br>( <i>Wo yen mpɔnkye a wo ne wɔn na ete anaa?</i> )                                                                                                                                  | Yes (Aane)<br>No(Daabi) | 1<br>2 |  | GOT |

|                              |                                                                                                                                    |                                           |             |  |     |
|------------------------------|------------------------------------------------------------------------------------------------------------------------------------|-------------------------------------------|-------------|--|-----|
|                              |                                                                                                                                    |                                           |             |  |     |
| 28.                          | Do you Share living space, (that is staying under the same roof) with poultry?<br>( <i>Wo yen nkoko a wo ne won na ete anaa?</i> ) | Yes (Aane)<br>No(Daabi)                   | 1<br>2      |  | POU |
| 29.                          | Do you Share living space , (that is staying under the same roof) with pigs?<br>( <i>Wo yen mpreko a wo ne won na ete anaa?</i> )  | Yes (Aane)<br>No(Daabi)                   | 1<br>2      |  | PIG |
| 30.                          | Do you Share living space , (that is staying under the same roof) with cats?<br>( <i>Wo ne nkra na ete anaa?</i> )                 | Yes (Aane)<br>No(Daabi)                   | 1<br>2      |  | CAT |
| 31.                          | Do you Share living space , (that is staying under the same roof) with dogs?<br>( <i>Wone nkraman na ete anaa?</i> )               | Yes (Aane)<br>No(Daabi)                   | 1<br>2      |  | DOG |
| 32.                          | What is your primary source of drinking water?<br>( <i>Wo nsuo a wonum no, henfa na wo nya firi?</i> )                             | River or stream<br>Borehole<br>Pipe borne | 1<br>2<br>3 |  | DRK |
| <b>INSECT BITES/BEHAVIOR</b> |                                                                                                                                    |                                           |             |  |     |
| 33.                          | Have you received insect bite in water/mud ?<br>( <i>Ntumoa, wofiri nsuo anaa atekye mu aka wo da?</i> )                           | Yes (Aane)<br>No(Daabi)                   | 1<br>2      |  | BIT |

|                            |                                                                                                         |                         |        |  |      |
|----------------------------|---------------------------------------------------------------------------------------------------------|-------------------------|--------|--|------|
| 34.                        | Do you use bed nets?<br>( <i>Wo da ntontom dan mu?</i> )                                                | Yes (Aane)<br>No(Daabi) | 1<br>2 |  | NET  |
| 35.                        | Do you Use mosquito coils?<br>( <i>Wo taa hye ntontom coil?</i> )                                       | Yes (Aane)<br>No(Daabi) | 1<br>2 |  | COIL |
| <b>TREATMENT WHEN HURT</b> |                                                                                                         |                         |        |  |      |
| 36.                        | Do you use Soap and water?<br>( <i>Se wo pira a, wo de nsuo ne samina hohoro?</i> )                     | Yes (Aane)<br>No(Daabi) | 1<br>2 |  | SOAP |
| 37.                        | Do you Rub the area with alcohol after a bite?<br>( <i>Se aboa bi ka wo a, wo de nsa twetwere so?</i> ) | Yes (Aane)<br>No(Daabi) | 1<br>2 |  | ACH  |
| 38a.                       | Do you use Leaves on the site of injury?<br>( <i>Eye a, wo pira a, wode ahahanman twetwere so?</i> )    | Yes (Aane)<br>No(Daabi) | 1<br>2 |  | LEAV |
| 38b.                       | What is the name of the leaves you use?<br>( <i>Nhahanma no, wɔfrɛ no sɛn</i> )                         | _____                   |        |  |      |
| 39.                        | Do you use adhesive bandage when you get hurt?<br>( <i>Wo pira a, wo de bandage kyekyere so?</i> )      | Yes (Aane)<br>No(Daabi) | 1<br>2 |  | BAN  |
| <b>ACTIVITIES</b>          |                                                                                                         |                         |        |  |      |
| 40.                        | Do you Wade in the Densu river?<br>( <i>Eye a, wo kɔ nante, nante Densu nsuo no mu?</i> )               | Yes (Aane)<br>No(Daabi) | 1<br>2 |  | DEN  |

|     |                                                                                                                                         |                         |        |            |       |
|-----|-----------------------------------------------------------------------------------------------------------------------------------------|-------------------------|--------|------------|-------|
| 41. | Do you Wade in a river or stream?<br>( <i>Eye a, wo nante,nante anaa nsubɔntene mu?</i> )                                               | Yes (Aane)<br>No(Daabi) | 1<br>2 |            | WRIV  |
| 42. | Do you Wash your clothes?<br>( <i>Eye a wosi wo nneema?</i> )                                                                           | Yes (Aane)<br>No(Daabi) | 1<br>2 |            | WAS   |
| 43. | Do you Fetch water?<br>( <i>Eye a wokɔ nsuo?</i> )                                                                                      | Yes (Aane)<br>No(Daabi) | 1<br>2 |            | FET   |
| 44. | Do you Farm?<br>( <i>Wo ye afuo?</i> )                                                                                                  | Yes (Aane)<br>No(Daabi) | 1<br>2 | If no >>49 | FARM  |
| 45. | Do you Farm and wear long upper body clothing/shirt?<br>( <i>W'afuom ntaadee a, eye a wohye wɔ wo soro no, eye dee ne nsa woware?</i> ) | Yes (Aane)<br>No(Daabi) | 1<br>2 |            | WEAR  |
| 46. | Do you Farm and wear short upper body clothing/shirt?<br>( <i>W'afuom ntaadee a, eye a wohye wɔ wo ye dee ne nsa eye ntiantea? )</i> )  | Yes (Aane)<br>No(Daabi) | 1<br>2 |            | WSHT  |
| 47. | Do you Farm and wear long pants/dress?<br>( <i>Worekɔ afuom a, wohye ataadee a, ware?</i> )                                             | Yes (Aane)<br>No(Daabi) | 1<br>2 |            | WLOG  |
| 48. | Do you Farm and wear short pants/dress?<br>( <i>Worekɔ afuom a, wohye ataadee a eye tia?</i> )                                          | Yes (Aane)<br>No(Daabi) | 1<br>2 |            | FWSHT |
| 49. | Do you Fish?<br>( <i>Wo yi nam?</i> )                                                                                                   | Yes (Aane)<br>No(Daabi) | 1<br>2 | If no >>56 | FISH  |

|                       |                                                                                                                                             |                         |        |  |       |
|-----------------------|---------------------------------------------------------------------------------------------------------------------------------------------|-------------------------|--------|--|-------|
| 50.                   | Do you Fish, but not in the Densu river?<br>( <i>Wo yi nam nam, nanso Densu nsuo mu?</i> )                                                  | Yes (Aane)<br>No(Daabi) | 1<br>2 |  | NDEN  |
| 51.                   | Do you Fish in the Densu river?<br>( <i>Wo yi nam wɔ Densu nsuo mu?</i> )                                                                   | Yes (Aane)<br>No(Daabi) | 1<br>2 |  | INDEN |
| 52.                   | Do you Fish with long upper body clothing?<br>( <i>Wo ntaadeɛ a wo hyɛ wɔ soro yi nam no, eyɛ a, na ɛware?</i> )                            | Yes (Aane)<br>No(Daabi) | 1<br>2 |  | FLCTH |
| 53.                   | Do you Fish with short/no upper body clothing?<br>( <i>Wo ntaadeɛ a wo hyɛ wɔ soro de yi nam no yɛ a na eyɛ tia anaa wonhyɛ bi koraa?</i> ) | Yes (Aane)<br>No(Daabi) | 1<br>2 |  | FSHTC |
| 54.                   | Do you Fish with long lower body clothing?<br>( <i>Wo ntaadeɛ a, wo hyɛ wɔ fɔm de yin am no, yɛ a na ɛware anaa wonhyɛ bi koraa?</i> )      | Yes (Aane)<br>No(Daabi) | 1<br>2 |  | FLLC  |
| 55.                   | Do you fish with short/no lower body clothing?<br>( <i>Wo ntaadeɛ a wohyɛ wɔn fɔm de yi nam no yɛ a na yɛ tia anaa wonhyɛ bi koraa?</i> )   | Yes (Aane)<br>No(Daabi) | 1<br>2 |  | FSLC  |
| <b>BATH (HYGIENE)</b> |                                                                                                                                             |                         |        |  |       |
| 56.                   | Do you have your bath for hygiene?<br>( <i>Ahoteɛ nti na yɛ a wodware?</i> )                                                                | Yes (Aane)<br>No(Daabi) | 1<br>2 |  | BATH  |
| 57.                   | Do you have your bath for hygiene, but not in the Densu river?<br>( <i>Ahoteɛ nti na wodware nanso ɛnyɛ Densu nsuo mu anaa?</i> )           | Yes (Aane)<br>No(Daabi) | 1<br>2 |  | BAH   |
|                       |                                                                                                                                             |                         |        |  |       |



|      |                                                                                                                                             |                         |        |        |      |
|------|---------------------------------------------------------------------------------------------------------------------------------------------|-------------------------|--------|--------|------|
| 58.  | Do you have your bath for hygiene in the Densu river?<br>( <i>Ahoteɛ nti na wodware wɔ Densu nsuo no mu anaa?</i> )                         | Yes (Aane)<br>No(Daabi) | 1<br>2 |        | BATD |
| 59.  | Do you have your bath for hygiene, but not water from open borehole?<br>( <i>Ahoteɛ enti na wodware nanso enye wɔ nsubura mu nsuo mu?</i> ) | Yes (Aane)<br>No(Daabi) | 1<br>2 |        | BNBH |
| 60.  | Do you have your bath for hygiene with water from open borehole?( <i>Ahoteɛ enti na wodware nanso ewɔ nsubura mu nsuo mu?</i> )             | Yes (Aane)<br>No(Daabi) | 1<br>2 |        | BOBH |
| 61.  | Do you Swim/dive/play in water?<br>( <i>Wo di agorɔ, dware, to wo ho to nsuo mu?</i> )                                                      | Yes (Aane)<br>No(Daabi) | 1<br>2 |        | SIW  |
| 62.  | Do you Swim? ( <i>Wonim nsuo mu adware?</i> )                                                                                               | Yes (Aane)<br>No(Daabi) | 1<br>2 |        | SWIM |
| 63.  | Do you Swim, but not in the Densu river ?<br>( <i>Wonim nsuo mu adwareɛ nanso enye Densu nsuom?</i> )                                       | Yes (Aane)<br>No(Daabi) | 1<br>2 |        | SWND |
| 64.  | Do you Swim in the Densu river?<br>( <i>Wodware wɔ Densu nsuo no mu?</i> )                                                                  | Yes (Aane)<br>No(Daabi) | 1<br>2 | >> 64a | SWID |
| 64a. | If yes, How often do you swim in the Densu river in a week                                                                                  | _____                   |        |        |      |
